# Supplementary material for: The QseEF Two-Component System-GlmY Small RNA Regulatory Pathway Controls Swarming in Uropathogenic Proteus mirabilis
Source: MDPI journal article supplement (doi:10.3390/ijms23010487), 2022-01-01
Supplement: s1 [file s1]

**Table S1.** Bacterial strains and plasmids used in this study.

| Strain or plasmid   | Genotype or relevant phenotype                                                                                                                                                                                                                                | Source              |
|---------------------|---------------------------------------------------------------------------------------------------------------------------------------------------------------------------------------------------------------------------------------------------------------|---------------------|
| <i>P. mirabilis</i> |                                                                                                                                                                                                                                                               |                     |
| wt                  | Wild-type N2; Tet <sup>r</sup>                                                                                                                                                                                                                                | Clinical isolate    |
| <i>qseE</i>         | wt derivative; <i>qseE</i> -knockout mutant; Km <sup>r</sup>                                                                                                                                                                                                  | This study          |
| <i>qseF</i>         | wt derivative; <i>qseF</i> -knockout mutant; Km <sup>r</sup>                                                                                                                                                                                                  | This study          |
| <i>qseG</i>         | wt derivative; <i>qseG</i> -knockout mutant; Km <sup>r</sup>                                                                                                                                                                                                  | This study          |
| <i>qseEGF</i>       | wt derivative; <i>qseEGF</i> -knockout mutant; Km <sup>r</sup>                                                                                                                                                                                                | This study          |
| <i>qseFc</i>        | <i>qseF</i> mutant containing pGEM- <i>qseF</i> ; <i>qseF</i> -complemented strain; Amp <sup>r</sup>                                                                                                                                                          | This study          |
| <i>glmY</i>         | wt derivative; <i>glmY</i> -knockout mutant; Km <sup>r</sup>                                                                                                                                                                                                  | This study          |
| <i>glmYc</i>        | <i>glmY</i> mutant containing pGEM- <i>glmY</i> ; <i>glmY</i> -complemented strain; Amp <sup>r</sup>                                                                                                                                                          | This study          |
| <i>E. coli</i>      |                                                                                                                                                                                                                                                               |                     |
| DH5α                | <i>fhuA2 lac(del)U169 phoA glnV44 Φ80' lacZ(del)M15 gyrA96 recA1 relA1 endA1 thi-1 hsdR17</i>                                                                                                                                                                 | Invitrogen          |
| S17-1 λ <i>pir</i>  | λ <i>pir</i> lysogen of S17-1 [ <i>thi pro hsdR<sup>-</sup> hsdM<sup>+</sup> recA</i> RP4 2-Tc::Mu-Km::Tn7 (Tp <sup>r</sup> Sm <sup>r</sup> )]; permissive host able to transfer suicide plasmids requiring the Pir protein by conjugation to recipient cells | Biomedical          |
| Plasmids            |                                                                                                                                                                                                                                                               |                     |
| pGEM-T Easy         | High-copy TA cloning vector; Amp <sup>r</sup>                                                                                                                                                                                                                 | Promega             |
| pUT-Km1             | Suicide plasmid requiring the Pir protein for replication and containing a mini-Tn5 cassette containing Km <sup>r</sup> gene                                                                                                                                  |                     |
| pACYC184            | Low-copy cloning vector, P15A replicon; Cm <sup>r</sup> Tet <sup>r</sup>                                                                                                                                                                                      | New England Biolabs |
| pBAD33              | Cloning expression vector, P15A replicon; Cm <sup>r</sup>                                                                                                                                                                                                     | ATCC                |

Tet, tetracycline; Km, kanamycin; Cm, chloramphenicol; Amp, ampicillin; Tp, trimethoprim; Sm, streptomycin.

**Table S2.** Primers used in this study.

| Primers       | Sequence (5' to 3')                     | Description                                                 |
|---------------|-----------------------------------------|-------------------------------------------------------------|
| qseF-upF      | CAGGTCACAAAAACAGGTGTC                   | For <i>qseF</i> knockout. Paired with “XbaI-qseF-upR”.      |
| XbaI-qseF-upR | <u>TCTAGAC</u> AGCCATGCACATTCTCC        | For <i>qseF</i> knockout. Paired with “qseF-dnR”.           |
| XbaI-qseF-dnF | <u>TCTAGAC</u> GTTCATCGAGCAATGTGT<br>CG |                                                             |
| qseF-dnR      | GTTCTCGCTCATCAAAGAC                     | For GlmY knockout. Paired with “XbaI-glmY-upR”.             |
| glmY-upF      | TTTACGTGATGAGTTTGCCC                    |                                                             |
| XbaI-glmY-upR | <u>TCTAGAC</u> TTGGCTTATGTGGTATG        | For GlmY knockout. Paired with “glmY-dnR”.                  |
| glmY-dnF      | CATTCTAGAGCCTGTTGC                      |                                                             |
| glmY-dnR      | TCATGGCGTTGCGATTCTA                     | For <i>qseF</i> complementation. Paired with “qseF-comR”.   |
| qseF-comF     | AGCGCAACGGTTAAACCTAC                    |                                                             |
| qseF-comR     | CAGTTTAACTGAGCAAGTGCGAG                 | For GlmY complementation. Paired with “glmY-comR”.          |
| glmY-comF     | CCTTGGATGCGCTTATTCCGT                   |                                                             |
| glmY-comR     | AAGGTGGTGCCTCACTCCA                     | For <i>flhDC</i> real-time RT-PCR. Paired with “flhDCrt-R”. |
| flhDCrt-F     | CACGAGCATGGACATTAG                      |                                                             |
| flhDCrt-R     | GCAGGATTGGCGGAAAGTT                     | For <i>glmY</i> real-time RT-PCR. Paired with “glmYrt-R”.   |
| glmYrt-F      | GGAACATACCACATAAGCCAAG                  |                                                             |
| glmYrt-R      | CGCTCGTCAATATTCATCTCTT                  | For <i>rcsB</i> real-time RT-PCR. Paired with “rcsBrt-R”.   |
| rcsBrt-F      | GCAGATGCTCTTATCACC                      |                                                             |
| rcsBrt-R      | CAGGCGCACCTTGTTTTA                      | For <i>cheA</i> real-time RT-PCR. Paired with “cheArt-R”.   |
| cheArt-F      | AGATGCGAATGCGTGTACCTT                   |                                                             |
| cheArt-R      | AGGCGATATCATCGGGCTTA                    | Internal control for real-time RT-PCR. Paired with “gyrB-   |
| gyrBrt-F      | GACCCGTACGCTAAACAAC                     |                                                             |

|                                 |                                                                    |                                                                                            |
|---------------------------------|--------------------------------------------------------------------|--------------------------------------------------------------------------------------------|
|                                 |                                                                    | rtR”.                                                                                      |
| gyrBrT-R<br>flhDC-reF           | AGAAATAACCGCAATCAGG<br>GGGTAGATTCGCTTATTAATT<br>CTC                | For <i>flhDC</i> reporter<br>assay. Paired with<br>“flhDC-reR”.                            |
| flhDC-reR<br>glmY-reF           | CTCTTTACATCCCGTCCGAT<br><u>GCATGCCTTGGATGCGCTTATTCCG</u>           | For <i>glmY</i> reporter<br>assay. Paired with<br>“glmY-reR”.                              |
| glmY-reR                        | <u>CTGCAGTTAATATAATGCACAAGGC</u><br>GT                             |                                                                                            |
| BglIII-xylE-F                   | <u>AGATCTATGAACAAAGGTGTAATGC</u><br>G                              | For <i>cheA</i> translational<br>reporter assay. Paired<br>with “xylE-R”.                  |
| xylE-R<br>SacI-cheA-5’UTR-<br>F | AAGTCGTACCGGACCATCAG<br><u>GAGCTCTATCAGGTCATACCGATGA</u><br>T      | For <i>cheA</i> translational<br>reporter assay. Paired<br>with “BglIII-cheA-<br>5’UTR-R”. |
| BglIII-cheA-<br>5’UTR-R         | <u>AGATCTTGT</u> TTTGATAAAACTCGG                                   |                                                                                            |
| cheA-5’UTR 253bp                | CACCAGCAATAAAAGAGGCATCAG                                           | For <i>cheA</i> translational<br>reporter assay. Paired<br>with “xylE-orf-R”.              |
| cheA-5’UTR 138bp                | GCTTCCCGAATCAAAAAAGGA                                              | For <i>cheA</i> translational<br>reporter assay. Paired<br>with “xylE-orf-R”.              |
| cheA-5’UTR 61bp                 | CGACATAACAGGAAACAACCTCC                                            | For <i>cheA</i> translational<br>reporter assay. Paired<br>with “xylE-orf-R”.              |
| xylE-orf-R<br>cheA-mut-F        | AAGTCGTACCGGACCATCAG<br>CAGCTAATATTTGTCGATTGTG                     | For site-direct<br>mutagenesis. Paired<br>with “cheA-mut-R”.                               |
| cheA-mut-R<br>glmY-mut-F        | TATTCAGGAAACAACCTCTTAG<br>AATACAGCGTCCACAATATGGGTGG<br>GAA         | For site-direct<br>mutagenesis. Paired<br>with “glmY-mut-R”.                               |
| glmY-mut-R<br>qseF-SP-RT        | AAAGTTGAATGAGCAACTGA<br>GCTGTATTTCTGCAAATAGC                       | <i>qseF</i> gene-specific RT<br>primer                                                     |
| PM-qse-us-F                     | GTTCCCTCGCTCATCAAAGAC                                              | For <i>qseEGF</i><br>knockout. Paired with<br>“PM-qse-us-R”.                               |
| PM-qse-us-R<br>PM-qse-ds-F      | TCTAGCGTCATCGAGCAATGTGTCG<br><u>TCTAGAAAGAGAATGAAGGTGGTG</u><br>CC | For <i>qseEGF</i><br>knockout. Paired with<br>“PM-qse-ds-R”.                               |
| PM-qse-ds-R                     | TTTACGTGATGAGTTTGCCC                                               |                                                                                            |

|              |                                                           |                                                          |
|--------------|-----------------------------------------------------------|----------------------------------------------------------|
| PM-qseG-us-F | GCTCAACGTGGGGATACG                                        | For <i>qseG</i> knockout.<br>Paired with “PM-qseG-us-R”. |
| PM-qseG-us-R | <u>TCTAGAC</u> AGTTAAACCTGAACCAC<br>C                     |                                                          |
| PM-qseG-ds-F | <u>TCTAGATT</u> GATGCAGGGG                                | For <i>qseG</i> knockout.<br>Paired with “PM-qseG-ds-R”. |
| PM-qseG-ds-R | GCCACGTGAATTACGCTC                                        |                                                          |
| PM-qseE-us-F | GACCCAGTCACGTAGCGATAGCGG<br>AGTGTAAGATGGCCGCTCAACAAT<br>C | For <i>qseE</i> knockout.<br>Paired with “PM-qseE-us-R”. |
| PM-qseE-us-R | TTGAGACACAACGTGTCGGGGAAA<br>AATACGCCAC                    |                                                          |
| PM-qseE-ds-F | GATGAGTTTTTCTAATCGTATTGAA<br>CTACCGCTAC                   | For <i>qseE</i> knockout.<br>Paired with “PM-qseE-ds-R”. |
| PM-qseE-ds-R | CTGCTCTGATGCCGCATAGTTAAGC<br>CAGTAAATAGCATCCACAGAAGC      |                                                          |

The recognition sequences of endonucleases are underlined.
